# Supplementary figures and images for: Luminescence induced by strong cation–anion π–π interactions in crystals of viologen analogues
Source: Royal Society of Chemistry journal article supplement (doi:10.1039/c0ce00191k), 2010-11-12

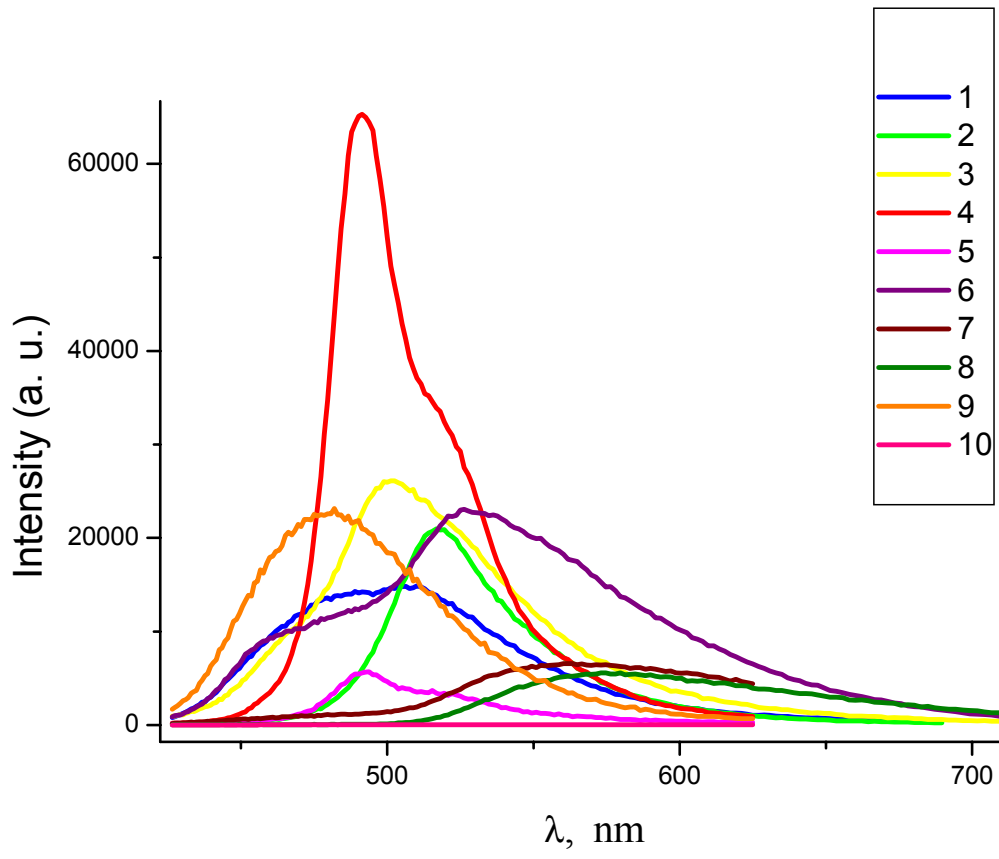

Supplement: c0ce00191k.pdf [file c0ce00191k.pdf]
